# Supplementary material for: Configuration–packing synergy enabling integrated crystalline-state RTP and amorphous-state TADF
Source: publisher site journal article supplement (doi:10.3762/bjoc.22.16), 2026-02-02
Supplement: Additional file 3 [file 1860-5397-22-16-S3.pdf]

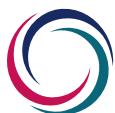

## Supporting Information

for

### **Configuration–packing synergy enabling integrated crystalline-state RTP and amorphous-state TADF**

Ruiyan Wang and Yunan Wu

*Beilstein J. Org. Chem.* **2026**, 22, 224–236. doi:10.3762/bjoc.22.16

## Checkcif file for compound 1

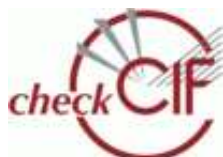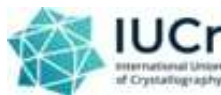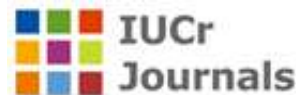

## checkCIF/PLATON report

Structure factors have been supplied for datablock(s) 19090503

THIS REPORT IS FOR GUIDANCE ONLY. IF USED AS PART OF A REVIEW PROCEDURE FOR PUBLICATION, IT SHOULD NOT REPLACE THE EXPERTISE OF AN EXPERIENCED CRYSTALLOGRAPHIC REFEREE.

No syntax errors found.      CIF dictionary      Interpreting this report

### Datablock: 19090503

---

|                        |                          |                                   |
|------------------------|--------------------------|-----------------------------------|
| Bond precision:        | C-C = 0.0023 Å           | Wavelength=1.54184                |
| Cell:                  | a=8.6894 (2)<br>alpha=90 | b=35.8672 (5)<br>beta=107.351 (2) |
| Temperature:           | 220 K                    | c=8.1002 (1)<br>gamma=90          |
|                        | Calculated               | Reported                          |
| Volume                 | 2409.67 (8)              | 2409.67 (8)                       |
| Space group            | P 21/c                   | P 1 21/c 1                        |
| Hall group             | -P 2ybc                  | -P 2ybc                           |
| Moiety formula         | C33 H22 N2 O2            | C33 H22 N2 O2                     |
| Sum formula            | C33 H22 N2 O2            | C33 H22 N2 O2                     |
| Mr                     | 478.53                   | 478.52                            |
| Dx, g cm <sup>-3</sup> | 1.319                    | 1.319                             |
| Z                      | 4                        | 4                                 |
| Mu (mm <sup>-1</sup> ) | 0.653                    | 0.653                             |
| F000                   | 1000.0                   | 1000.0                            |
| F000'                  | 1002.87                  |                                   |
| h, k, lmax             | 10, 44, 10               | 10, 43, 9                         |
| Nref                   | 4831                     | 4617                              |
| Tmin, Tmax             | 0.889, 0.974             | 0.297, 1.000                      |
| Tmin'                  | 0.861                    |                                   |

Correction method= # Reported T Limits: Tmin=0.297 Tmax=1.000  
AbsCorr = MULTI-SCAN

Data completeness= 0.956

Theta(max)= 73.323

R(reflections)= 0.0489( 4070)

wR2(reflections)=  
0.1427( 4617)

S = 0.997

Npar= 335

---

The following ALERTS were generated. Each ALERT has the format

**test-name\_ALERT\_alert-type\_alert-level.**

Click on the hyperlinks for more details of the test.

---

### ● Alert level C

PLAT906\_ALERT\_3\_C Large K Value in the Analysis of Variance ..... 2.116 Check  
PLAT911\_ALERT\_3\_C Missing FCF Refl Between Thmin & STh/L= 0.600 48 Report

|     |    |    |     |    |    |    |    |    |    |    |    |    |    |    |    |    |    |
|-----|----|----|-----|----|----|----|----|----|----|----|----|----|----|----|----|----|----|
| 1   | 0  | 0, | 2   | 0  | 0, | 3  | 0  | 0, | 0  | 20 | 0, | 0  | 22 | 0, | 0  | 24 | 0, |
| 6   | 34 | 0, | 2   | 1  | 1, | 0  | 22 | 1, | -1 | 23 | 1, | 0  | 23 | 1, | -1 | 24 | 1, |
| 0   | 24 | 1, | 0   | 0  | 2, | 1  | 0  | 2, | 2  | 0  | 2, | 0  | 1  | 2, | 0  | 22 | 2, |
| -10 | 1  | 5, | -10 | 2  | 5, | 4  | 0  | 6, | 5  | 0  | 6, | 5  | 1  | 6, | 5  | 2  | 6, |
| 5   | 3  | 6, | -9  | 11 | 6, | -9 | 12 | 6, | -9 | 13 | 6, | -9 | 14 | 6, | -8 | 21 | 6, |

( 18 More Missing: see the .ckf listing file)

---

### ● Alert level G

PLAT720\_ALERT\_4\_G Number of Unusual/Non-Standard Labels ..... 59 Note

|      |      |      |      |      |      |      |      |
|------|------|------|------|------|------|------|------|
| O001 | O002 | N003 | N004 | C005 | C006 | C007 | C008 |
| C009 | H009 | C00A | C00B | C00C | C00D | H00D | C00E |
| C00F | H00F | C00G | H00G | C00H | C00I | H00I | C00J |
| H00J | C00K | H00K | C00L | H00L | C00M | H00M | C00N |
| C00O | C00P | H00P | C00Q | C00R | C00S | H00S | C00T |
| H00T | C00U | H00U | C00V | H00V | C00W | H00W | C00X |
| H00X | C00Y | H00Y | C00Z | H00A | H00B | H00C | C010 |
| H010 | C011 | H011 |      |      |      |      |      |

PLAT910\_ALERT\_3\_G Missing FCF Reflection(s) Below Theta(Min) [Deg]= 4.93 Note  
0 2 0,

PLAT912\_ALERT\_4\_G Missing # of FCF Reflections Above STh/L= 0.600 152 Note

PLAT941\_ALERT\_3\_G Average HKL Measurement Multiplicity ..... 1.7 Low

PLAT969\_ALERT\_5\_G The 'Henn et al.' R-Factor-gap value ..... 2.785 Note  
Predicted wR2: Based on SigI\*\*2 5.13 or SHELX Weight 14.32

PLAT978\_ALERT\_2\_G Number C-C Bonds with Positive Residual Density. 16 Info

PLAT992\_ALERT\_5\_G Repd & Actual \_reflns\_number\_gt Values Differ by 2 Check

---

- 0 **ALERT level A** = Most likely a serious problem - resolve or explain  
0 **ALERT level B** = A potentially serious problem, consider carefully  
2 **ALERT level C** = Check. Ensure it is not caused by an omission or oversight  
7 **ALERT level G** = General information/check it is not something unexpected

- 0 ALERT type 1 CIF construction/syntax error, inconsistent or missing data  
1 ALERT type 2 Indicator that the structure model may be wrong or deficient  
4 ALERT type 3 Indicator that the structure quality may be low  
2 ALERT type 4 Improvement, methodology, query or suggestion  
2 ALERT type 5 Informative message, check
- 
-

**PLATON version of 26/09/2025; check.def file version of 20/09/2025**

## No duplication found

PLATON-Oct 1 9:25:03 2025 - (VERSION=260925)

40 Y

NOMOVE FORCED

Prob = 50%  
Temp = 220K

ORTEP diagram of a complex organic molecule, likely a carboxylate salt or a complex organic acid derivative. The structure features a central core with a nitrogen atom (N004) and a disordered region (N003). The molecule is shown in a stick representation with thermal ellipsoids at the 50% probability level. The structure includes several carboxylate groups (COO) and a central core with a nitrogen atom (N004) and a disordered region (N003). The molecule is shown in a stick representation with thermal ellipsoids at the 50% probability level. The structure includes several carboxylate groups (COO) and a central core with a nitrogen atom (N004) and a disordered region (N003).

Z -158 19090503 P 1 21/c 1 R = 0.05 RES= 0-121 X
